# Supplementary material
Source: PubMed Central journal article supplement (PMC3233656)

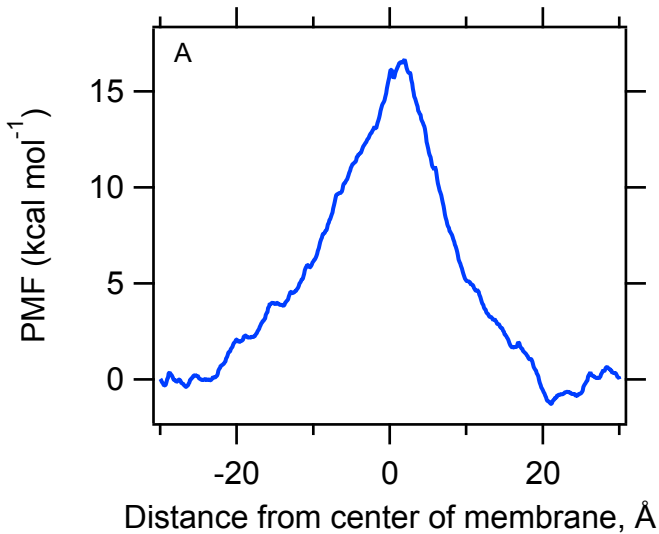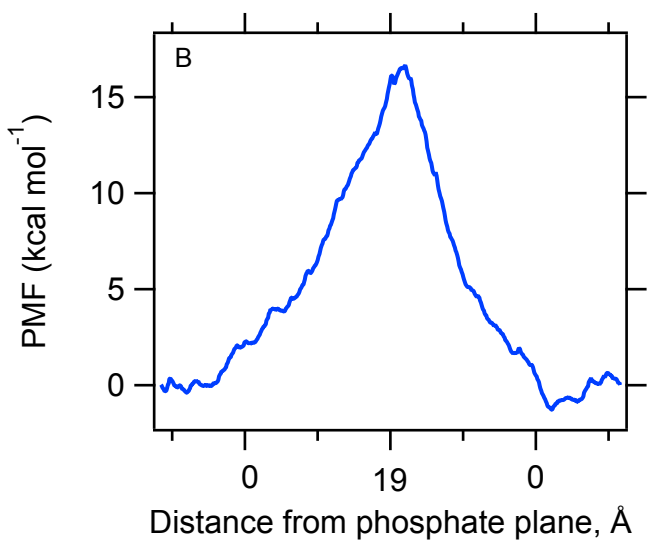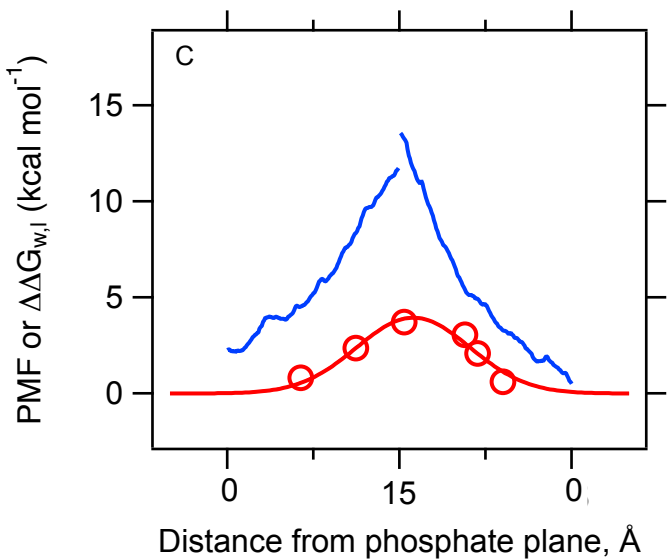

Supplement: NIHMS319629-supplement-01.pdf [file NIHMS319629-supplement-01.pdf]
